# Supplementary material for: Decadal Lake Volume Changes (2003–2020) and Driving Forces at a Global Scale
Source: MDPI journal article supplement (doi:10.3390/rs14041032), 2022-02-21
Supplement: s1 [file s1]

---

## Supplementary Materials for

### Decadal Lake Volume Changes (2003–2020) and Driving Forces at a Global Scale

Yuhao Feng<sup>1</sup>, Heng Zhang<sup>1</sup>, Shengli Tao<sup>1\*</sup>, Zurui Ao<sup>2</sup>, Chunqiao Song<sup>3</sup>, Jérôme Chave<sup>4</sup>, Thuy Le Toan<sup>5</sup>, Baolin Xue<sup>6</sup>, Jiangling Zhu<sup>1</sup>, Jiamin Pan<sup>1</sup>, Shaopeng Wang<sup>1</sup>, Zhiyao Tang<sup>1</sup> and Jingyun Fang<sup>1</sup>

<sup>1</sup> Institute of Ecology, College of Urban and Environmental Sciences, and Key Laboratory for Earth Surface Processes of the Ministry of Education, Peking University, Beijing 100871, China;

fengyuhao@pku.edu.cn (Y.F.); heng.zhang@pku.edu.cn (H.Z.); jlzhu@urban.pku.edu.cn (J.Z.); panjiamin@pku.edu.cn (J.P.); shaopeng.wang@pku.edu.cn (S.W.); zytang@urban.pku.edu.cn (Z.T.); jyfang@urban.pku.edu.cn (J.F.)

<sup>2</sup> Guangdong Key Laboratory for Urbanization and Geo-simulation, Sun Yat-sen University, Guangzhou 510275, China; ao zr@mail.sysu.edu.cn

<sup>3</sup> Key Laboratory of Watershed Geographic Sciences, Nanjing Institute of Geography and Limnology, Chinese Academy of Sciences, Nanjing 210008, China; cqsong@niglas.ac.cn

<sup>4</sup> Laboratoire Évolution Et Diversité Biologique, UMR 5174 (CNRS/IRD/UPS), 31062 Toulouse Cedex 9, France; jerome.chave@univ-tlse3.fr

<sup>5</sup> CESBIO, Université de Toulouse, CNES/CNRS/IRD/UPS, 31400 Toulouse, France; thuy.letuan@cesbio.cnes.fr

<sup>6</sup> College of Water Sciences, Beijing Normal University, Beijing 100875, China; xuebl@bnu.edu.cn

\* Correspondence: sltao@pku.edu.cn

---

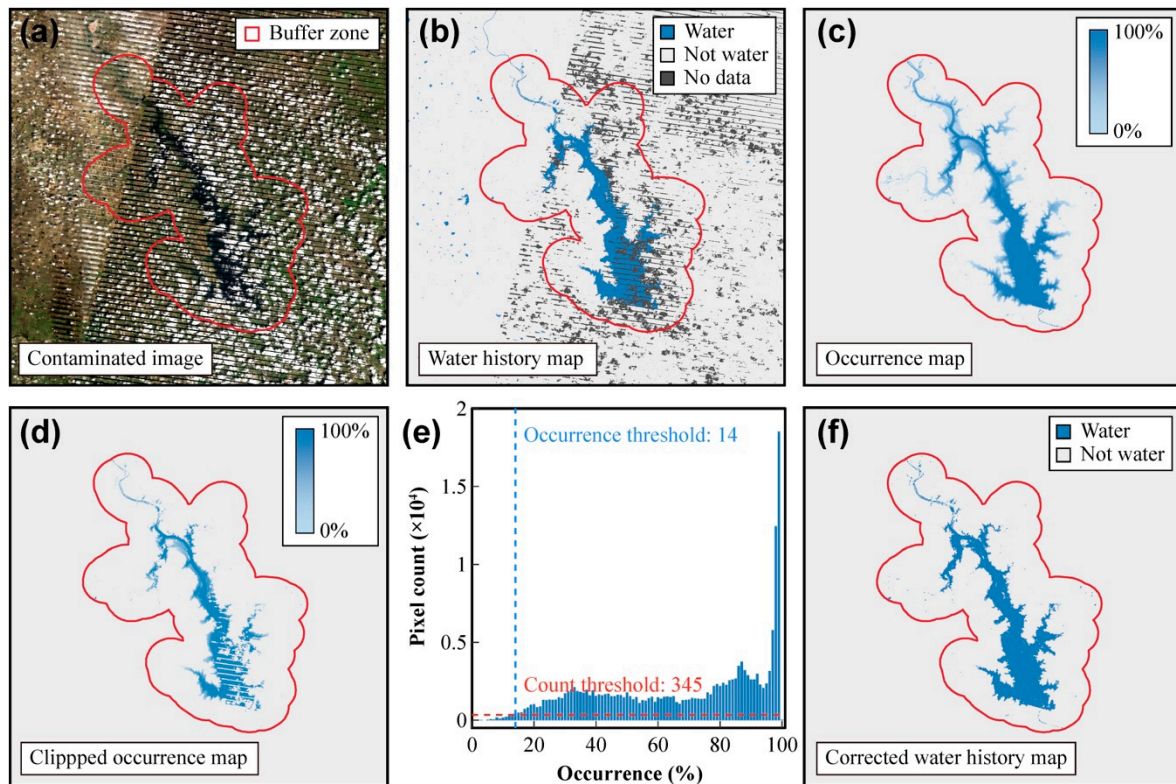

**Figure S1.** Correction of the GSW water history maps. The Falcon International Reservoir (26.76° N, 99.26° W) is used as an example here. (a) A low-quality Landsat image of the Falcon International Reservoir acquired in September of 2004; (b) the corresponding water history map of (a) extracted from the GSW database; (c) the water occurrence map of the Falcon Reservoir extracted from the GSW database; (d) the water occurrence map obtained by clipping (c) using (b) as a mask; (e) the histogram of the occurrence values in map (d), binned into 100 bars that were ordered from low to high occurrence; (f) the final, corrected water history map. In (a-c, d, and f), the buffered region was denoted by the red curve. In (e), a count threshold was calculated as  $0.17 \times$  averaged  $y$ -values (pixel counts) of the 100 bars. An occurrence threshold was then defined as the first occurrence whose  $y$ -value (pixel count) is greater than the count threshold [38]. This occurrence threshold was then used to binarize the water history map shown in (c): pixels in (c) with an occurrence value larger than this occurrence threshold was deemed as the final water bodies (f).

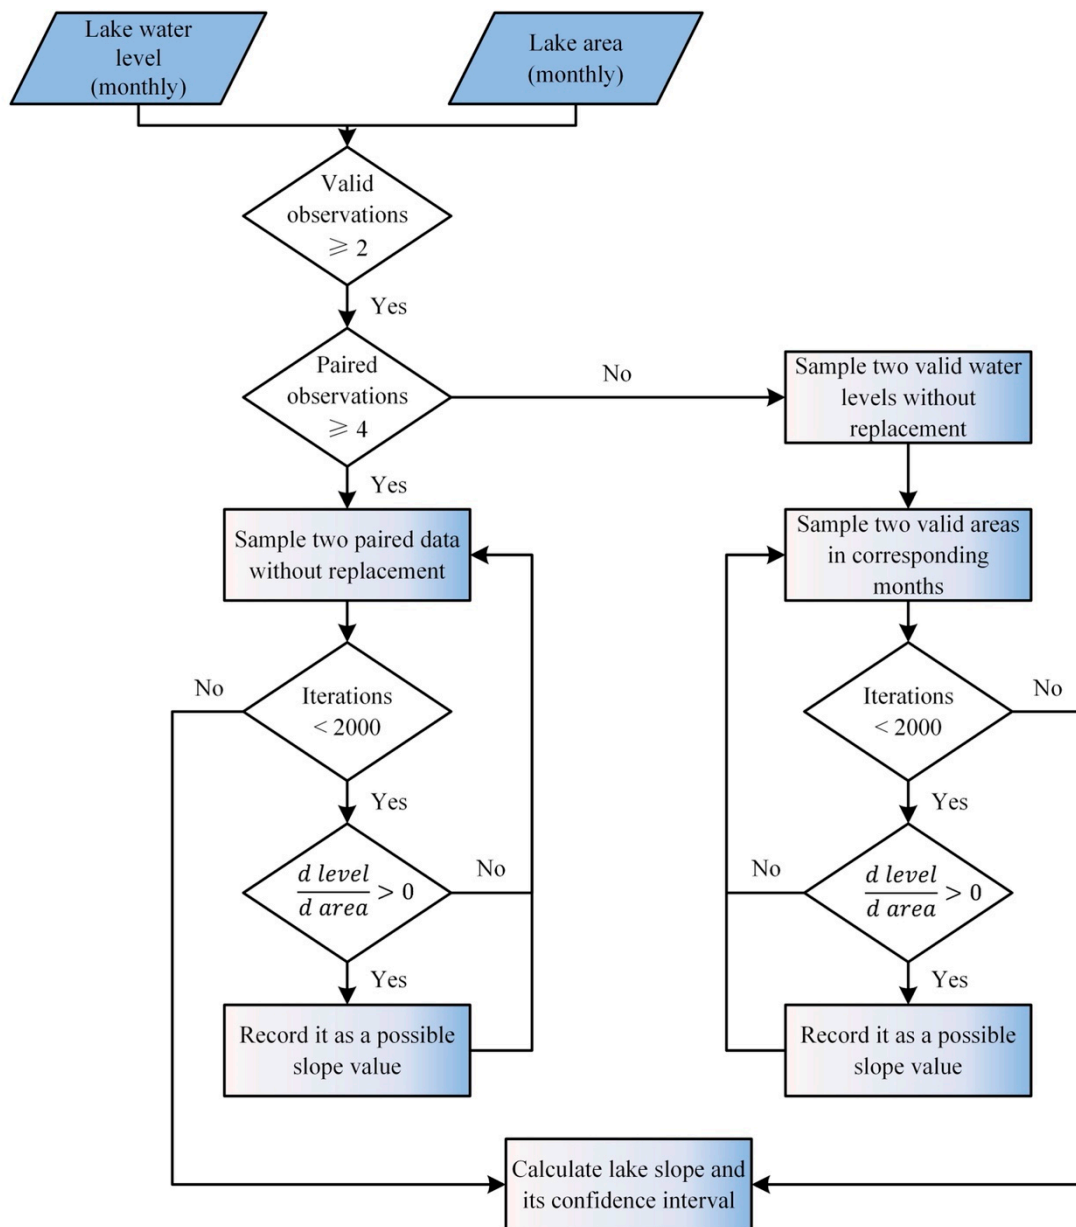

**Figure S2.** Sampling-based method for calculating the regression slope between lake area and lake water levels.

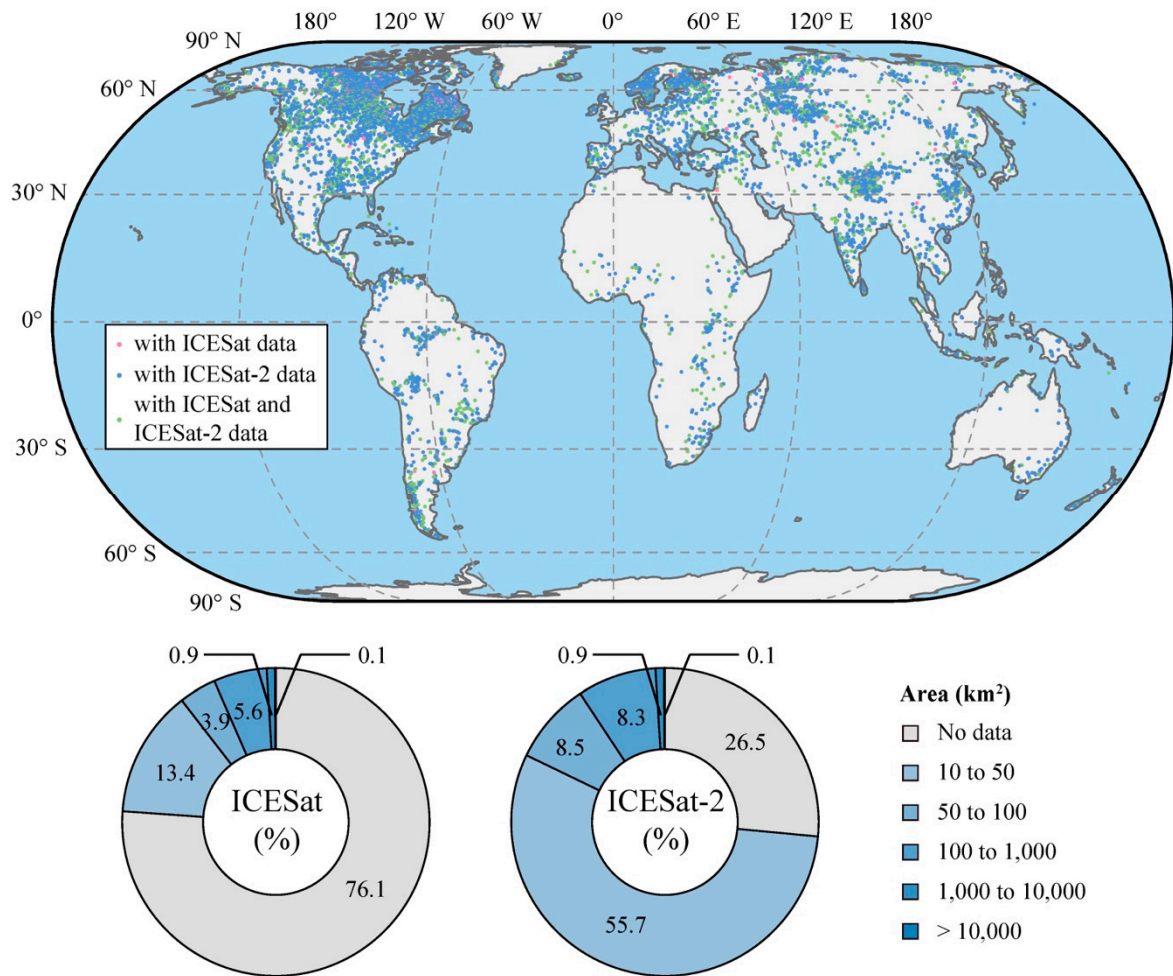

**Figure S3.** Spatial pattern and size distribution of the lakes with ICESat, ICESat-2, or both observations.

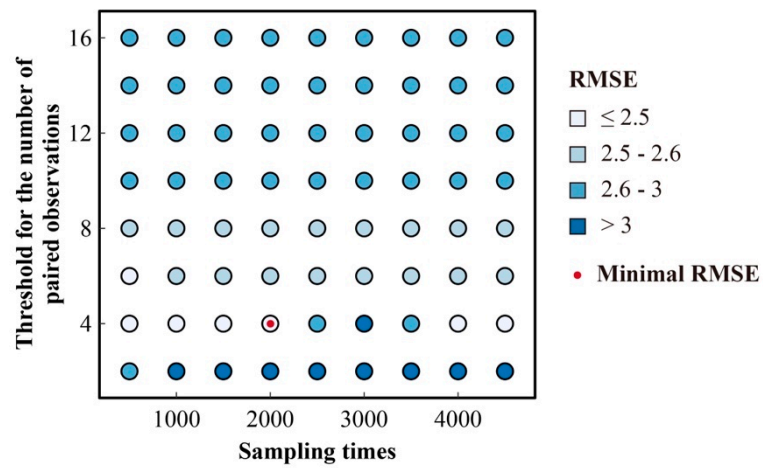

**Figure S4.** Comparison of in situ and area-derived water levels calculated by different parameters. The root mean square error (RMSE) reaches to the minimum when the threshold for the number of paired observations is set to 4 and the sampling times set to 2000.

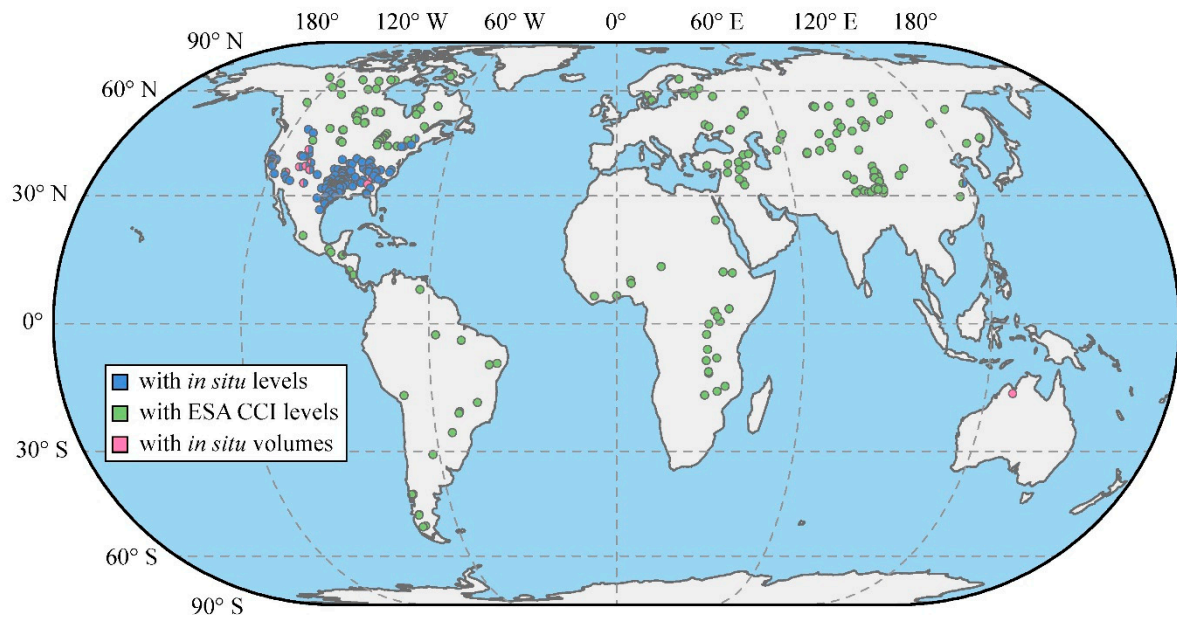

**Figure S5.** Spatial distribution of the lakes used for validating the results of the current study. Blue dots (or lakes) have *in situ* measurements of lake water level, green dots have ESA CCI water levels, and red dots have *in situ* measurements of lake volume.

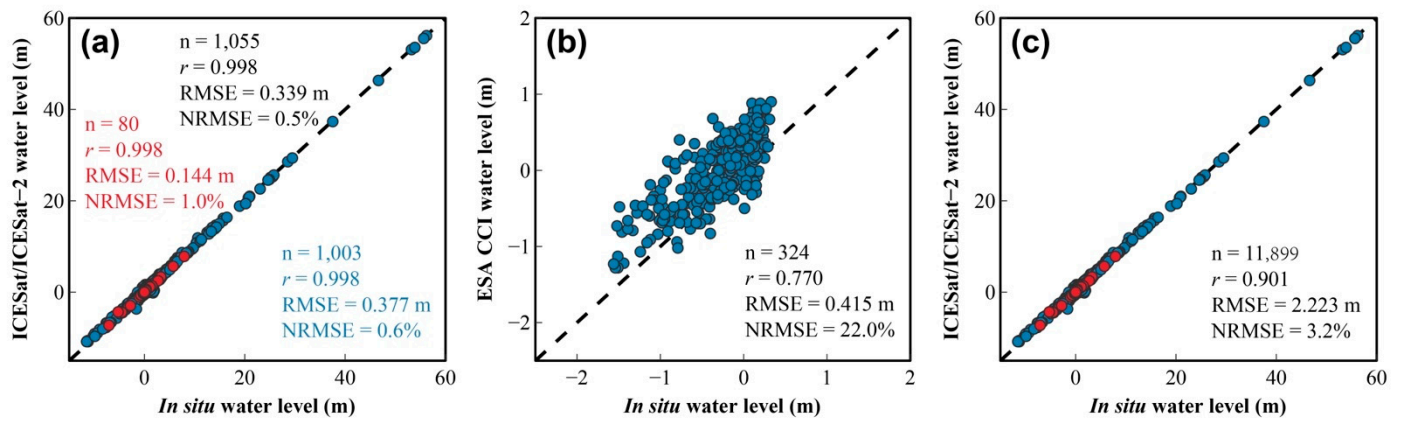

**Figure S6.** Validation of lake water levels. (a) Comparison between in situ water levels and lake water levels derived from ICESat/ICESat-2 data for the 132 lakes listed in Table S1. For spatial pattern of the 132 lakes, see Figure S5. In this panel, each dot represents a water level observation from a lake, with its value normalized by subtracting the first available water level of this lake during 2003–2020. The normalization was used because lakes differ greatly in altitude, and because the vertical datums of ICESat/ICESat-2 data (EGM2008 geoid) and in situ measurements (NAVD88 geoid for lakes in the United States, and Yellow Sea 1985 for lakes in China) are inconsistent. The overall accuracy of ICESat and ICESat-2 data was written in black. The accuracy of ICESat (ICESat-2) alone was written in red (blue); (b) Comparison between in situ water levels and water levels extracted from the ESA CCI database, for 250 lakes having both observations; (c) Comparison between in situ water levels and area-derived water levels by the sampling-based method.



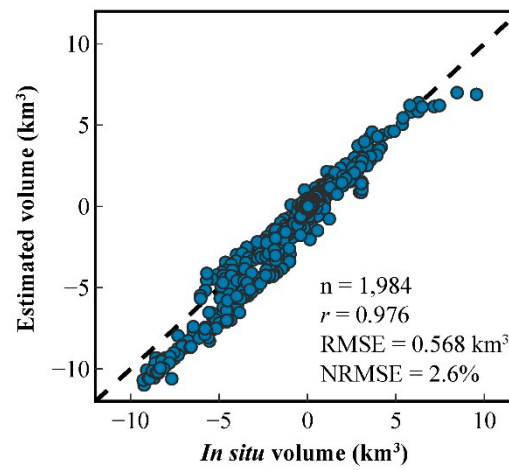

**Figure S7.** Accuracy assessment for the estimated lake volumes. Shown here is the overall accuracy of the estimated lake volumes compared with in situ volumes of the 14 lakes listed in Table S3. For spatial pattern of the 14 lakes, see Figure S5. Each dot represents a lake volume in a certain month, with its value normalized by subtracting the first volume available for this lake during 2003–2020. The normalization was used because lakes differ greatly in volume.



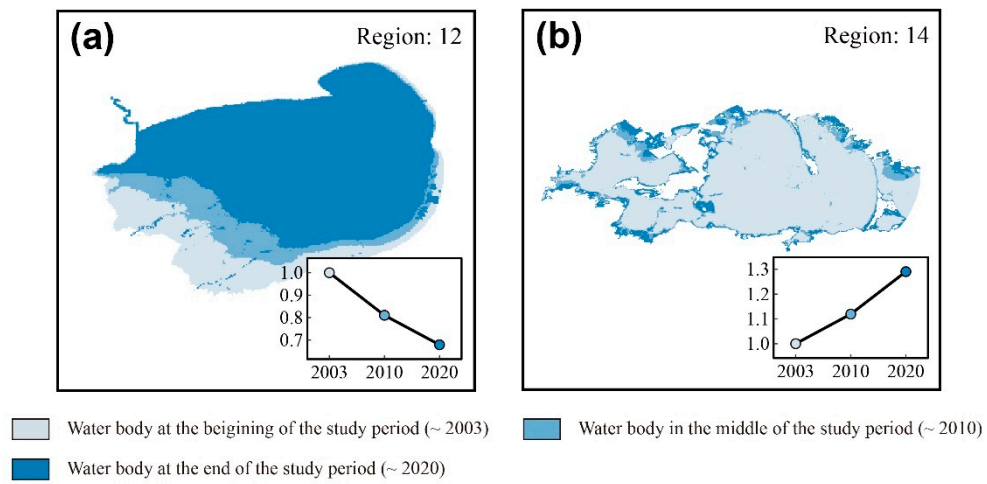

**Figure S8.** Shoreline changes for two lakes with drastic volume changes. (a) Airag Lake in region 12 ( $48.93^{\circ}$  N,  $93.36^{\circ}$  E), and (b) Xijir Lake in region 14 ( $35.21^{\circ}$  N,  $90.33^{\circ}$  E). The inset panels present the changes in relative area (lake area in 2003 equals to 1).

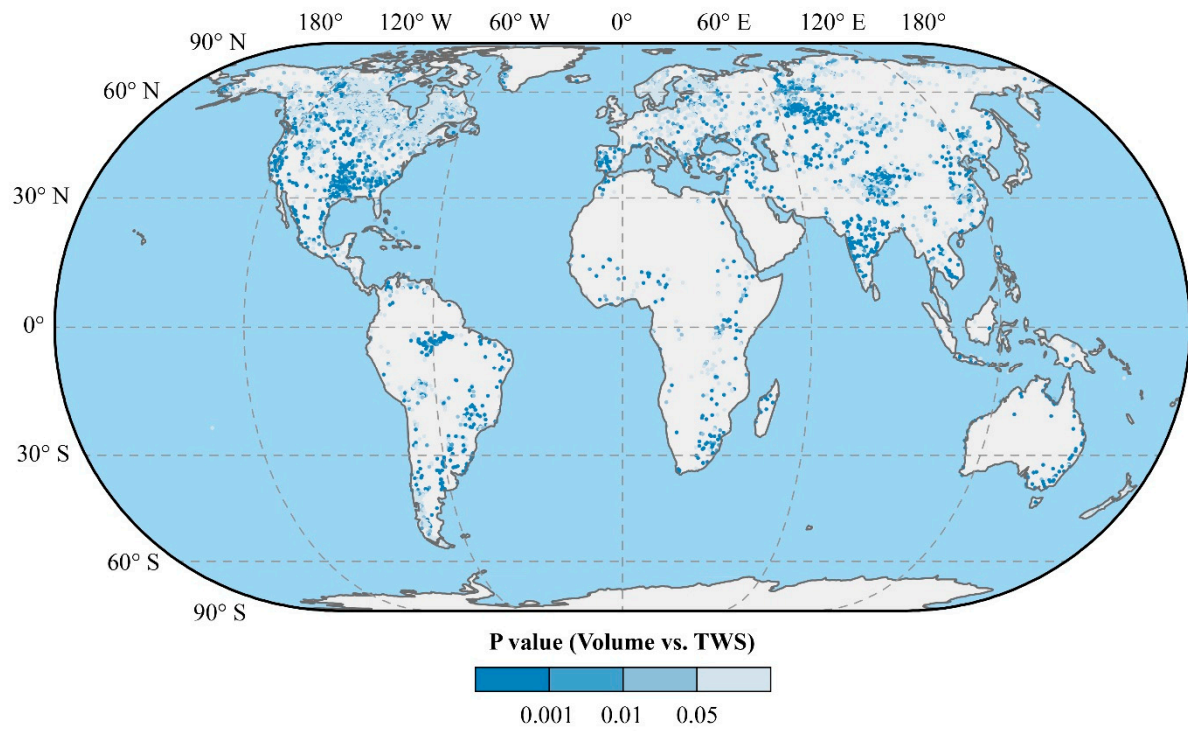

**Figure S9.** P values of the correlation coefficients between monthly lake volume and TWS.

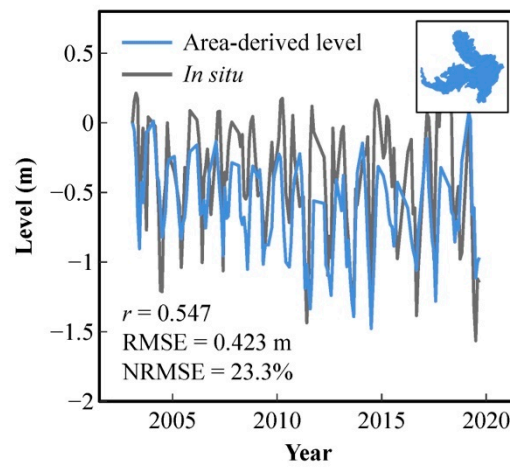

**Figure S10.** Area-derived water levels compared with in situ lake water levels for Lake Hongze in the lower Yangtze River Basin in China.

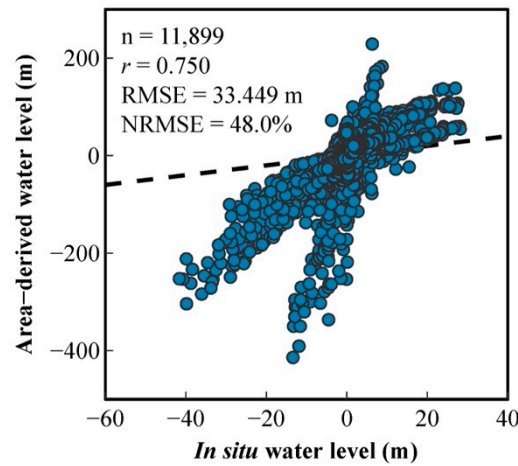

**Figure S11.** Validation of area-derived water levels for the 132 lakes described in Table S1. Here, lake water levels were derived from lake area using the topographic slopes ("Slope\_100") provided by Messenger et al. [30], instead of using the "Regression slope" between lake water levels and lake area as described in section 2.5 in the main text. "Slope\_100" was defined by Messenger et al. [30] as the average topographic slope within a 100-meter buffer around the lake boundary, in unit of degree. We converted 'Slope\_100' into "Regression slope" (i.e.,  $\frac{d \text{ level}}{d \text{ area}}$ ,  $\text{m}^{-1}$ ), as follows:  $\text{Regression slope} = \left( \sqrt{\frac{\text{area}+1}{\pi}} - \sqrt{\frac{\text{area}}{\pi}} \right) * \tan\left(\frac{180 * \text{Slope}_{100}}{\pi}\right)$ , where *area* is the area of a lake provided by the HydroLAKES database (in unit of  $\text{m}^2$ ). We assumed a circular shape of lake boundary for all lakes during the conversion. The dashed line corresponds to the line of identity ( $y = x$ ).

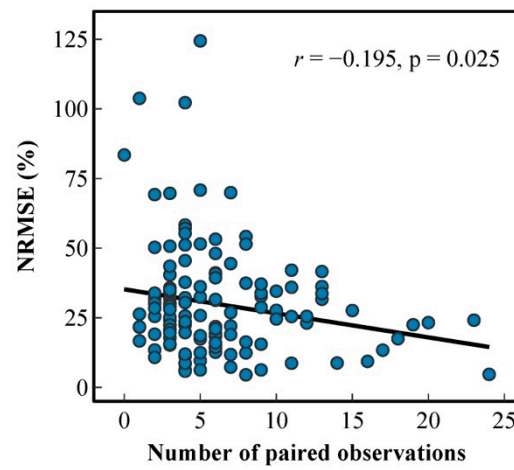

**Figure S12.** Relationship between the accuracy of the estimated lake water levels (NRMSE, %) and the number of paired observations between lake water level and lake area. Each dot represents one of the 132 lakes having in situ measurements of lake water level. The accuracy of the estimated lake water levels compared against in situ measurements was indicated by NRMSE, which is the normalized RMSE and is calculated as RMSE divided by the range of the in situ lake water levels.

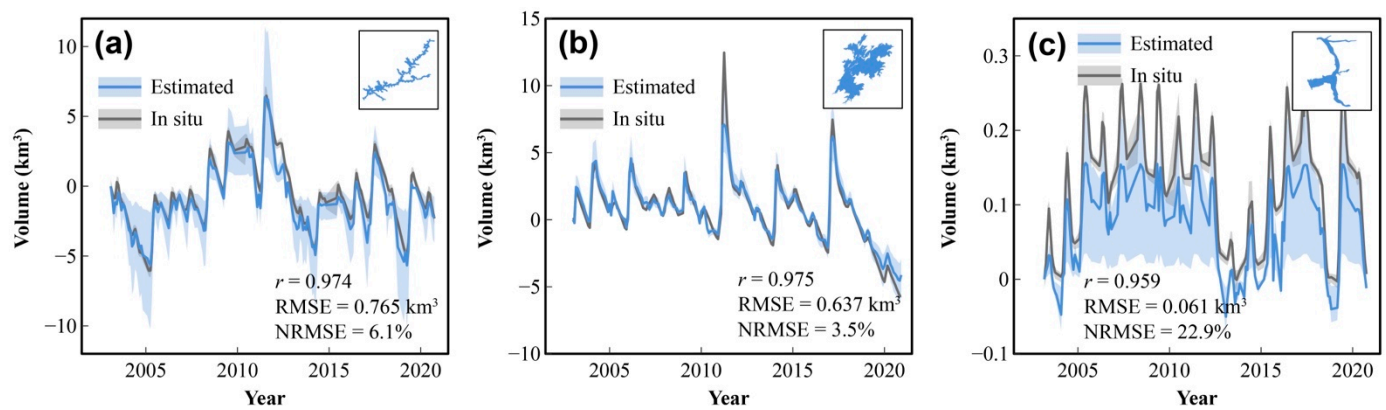

**Figure S13.** Time series of the estimated lake volumes compared to in situ lake volumes for three typical lakes. The three lakes are (a) Lake Powell ( $37.37^\circ \text{ N}, 110.73^\circ \text{ W}$ ), (b) Lake Argyle ( $16.12^\circ \text{ S}, 128.74^\circ \text{ E}$ ), and (c) McPhee Reservoir ( $37.58^\circ \text{ N}, 108.58^\circ \text{ W}$ ). In each panel, the y values have been normalized by subtracting the first volume available for this lake during 2003–2020. The blue shadows denote the 90% confidence interval of the estimated volumes, and gray shadows denote the range of the daily in situ measurements within each month.

**Table S1.** Validation of ICESat/ICESat-2-derived lake water levels. 131 lakes with in situ measurements of lake water level were obtained from the U.S. Lakes website (<http://www.uslakes.info/>), and they have at least two paired in situ and ICESat/ICESat-2-derived water levels (such that a change in lake water level can be calculated and compared). In addition, in situ measurements of water level for Lake Hongze were obtained from a local hydrological station. The spatial distribution of these 132 lakes is shown in Figure S5. In the table below, "Pearson's  $r$ " means the Pearson correlation coefficient between the estimated and in situ time series of lake water level; "RMSE" is the root mean square error between estimated and in situ time series of lake water level; "NRMSE" is the normalized RMSE, and is calculated as RMSE divided by the range of the in situ lake water levels.

| Lake ID | Lake name                   | Latitude (° ) | Longitude (°) | Pearson's $r$ | RMSE (km <sup>3</sup> ) | NRMSE (%) |
|---------|-----------------------------|---------------|---------------|---------------|-------------------------|-----------|
| 64      | Lake Champlain              | 45.05         | -73.33        | 0.618         | 0.168                   | 69.1      |
| 145     | Lake Hongze                 | 33.09         | 118.73        | 0.824         | 0.266                   | 17.6      |
| 730     | Flathead Lake               | 47.68         | -114.23       | 0.956         | 0.709                   | 27.3      |
| 743     | Canyon Ferry Lake           | 46.65         | -111.73       | 0.999         | 0.126                   | 2.8       |
| 784     | Flaming Gorge Reservoir     | 40.92         | -109.42       | 0.996         | 0.077                   | 3.6       |
| 786     | Shasta Lake                 | 40.72         | -122.42       | 1.000         | 0.142                   | 0.6       |
| 792     | Lake Tahoe                  | 39.16         | -120.14       | 0.535         | 0.149                   | 48.8      |
| 796     | Harry S. Truman Reservoir   | 38.26         | -93.41        | 0.954         | 0.186                   | 15.2      |
| 797     | Osage Lake                  | 38.21         | -92.63        | 0.964         | 0.105                   | 7.7       |
| 799     | Lake Powell                 | 37.37         | -110.73       | 0.997         | 0.635                   | 4.0       |
| 800     | Lake Barkley                | 37.02         | -88.22        | 0.889         | 0.408                   | 26.2      |
| 804     | Table Rock Lake             | 36.60         | -93.31        | 0.977         | 0.133                   | 7.3       |
| 805     | John H. Kerr Reservoir      | 36.60         | -78.29        | 0.788         | 0.314                   | 15.4      |
| 806     | Grand Lake                  | 36.47         | -95.04        | 0.981         | 0.137                   | 5.1       |
| 807     | Oologah Lake                | 36.42         | -95.68        | 0.991         | 0.081                   | 6.9       |
| 811     | Greers Ferry Lake           | 35.52         | -91.99        | 0.992         | 0.631                   | 14.1      |
| 814     | Robert S. Kerr Reservoir    | 35.35         | -94.78        | 0.601         | 0.203                   | 31.7      |
| 822     | Hartwell Lake               | 34.36         | -82.82        | 0.889         | 0.539                   | 60.9      |
| 823     | Lake Sidney Lanier          | 34.16         | -84.07        | 0.985         | 0.557                   | 9.6       |
| 825     | Lake Texoma                 | 33.82         | -96.57        | 0.936         | 0.294                   | 29.2      |
| 826     | Grenada Lake                | 33.81         | -89.77        | 0.881         | 0.434                   | 30.3      |
| 830     | Lake Moultrie               | 33.24         | -80.00        | 0.770         | 0.160                   | 32.9      |
| 831     | Elephant Butte Reservoir    | 33.16         | -107.19       | 1.000         | 0.102                   | 0.7       |
| 832     | Lake Tawakoni               | 32.81         | -95.91        | 0.898         | 0.129                   | 16.3      |
| 835     | Cedar Creek Reservoir       | 32.18         | -96.07        | 0.835         | 0.099                   | 25.0      |
| 836     | Richland-Chambers Reservoir | 31.95         | -96.10        | 1.000         | 0.052                   | 57.1      |
| 838     | Toledo Bend Reservoir       | 31.17         | -93.57        | 0.958         | 0.565                   | 27.3      |
| 839     | Sam Rayburn Reservoir       | 31.06         | -94.11        | 0.981         | 0.159                   | 6.1       |
| 841     | Lake Livingston             | 30.63         | -95.02        | 0.407         | 0.438                   | 95.7      |
| 848     | Amistad Reservoir           | 29.45         | -101.05       | 0.999         | 0.519                   | 3.5       |
| 855     | Falcon Reservoir            | 26.56         | -99.17        | 0.996         | 0.159                   | 3.6       |
| 9074    | Great Sacandaga Lake        | 43.32         | -73.92        | 0.981         | 0.120                   | 10.9      |
| 9096    | Owasco Lake                 | 42.90         | -76.54        | 1.000         | 0.036                   | 13.2      |
| 9097    | Canandagua Lake             | 42.87         | -77.27        | 0.999         | 0.154                   | 101.0     |
| 9132    | Fontenelle Reservoir        | 42.03         | -110.07       | 0.998         | 0.147                   | 3.4       |
| 9172    | Trinity Lake                | 40.80         | -122.76       | 1.000         | 0.451                   | 2.0       |
| 9180    | Whiskeytown Lake            | 40.60         | -122.54       | 0.998         | 0.104                   | 3.4       |
| 9189    | Starvation Reservoir        | 40.19         | -110.44       | -0.665        | 0.137                   | 131.1     |
| 9194    | Strawberry Reservoir        | 40.14         | -111.03       | 0.998         | 0.111                   | 8.0       |
| 9208    | Lake Oroville               | 39.54         | -121.48       | 1.000         | 0.191                   | 0.3       |
| 9209    | Mark Twain Lake             | 39.53         | -91.65        | 0.988         | 0.143                   | 6.3       |
| 9212    | Stampede Reservoir          | 39.47         | -120.11       | 1.000         | 0.201                   | 2.4       |
| 9220    | New Bullards Bar Reservoir  | 39.39         | -121.14       | 0.997         | 0.935                   | 8.1       |
| 9224    | Tuttle Creek Lake           | 39.26         | -96.59        | 0.997         | 0.750                   | 9.8       |
| 9229    | Monroe Lake                 | 39.01         | -86.50        | 0.993         | 0.113                   | 7.0       |
| 9235    | Folsom Lake                 | 38.71         | -121.16       | 0.999         | 0.398                   | 2.5       |
| 9239    | Carlyle Lake                | 38.62         | -89.35        | 0.981         | 0.079                   | 8.1       |
| 9244    | Ruedi Reservoir             | 38.45         | -107.33       | 1.000         | 0.139                   | 1.0       |
| 9246    | Patoka Lake                 | 38.43         | -86.71        | 0.937         | 0.604                   | 33.0      |
| 9259    | New Hogan Lake              | 38.15         | -120.81       | 0.996         | 0.122                   | 4.3       |



| Lake ID | Lake name                | Latitude (°) | Longitude (°) | Pearson's r | RMSE (km <sup>3</sup> ) | NRMSE (%) |
|---------|--------------------------|--------------|---------------|-------------|-------------------------|-----------|
| 9272    | Don Pedro Reservoir      | 37.70        | -120.42       | 1.000       | 0.311                   | 6.7       |
| 9277    | McPhee Reservoir         | 37.58        | -108.57       | 1.000       | 0.122                   | 1.5       |
| 9284    | Green River Lake         | 37.25        | -85.34        | 1.000       | 0.024                   | 11.2      |
| 9295    | Barren River Lake        | 36.89        | -86.12        | 1.000       | 0.080                   | 12.5      |
| 9299    | Great Salt Plains Lake   | 36.75        | -98.14        | 0.740       | 0.081                   | 24.3      |
| 9300    | Kaw Lake                 | 36.70        | -96.93        | 0.960       | 0.247                   | 12.3      |
| 9301    | Heron Reservoir          | 36.67        | -106.70       | 0.997       | 0.316                   | 2.6       |
| 9304    | El Vado Lake             | 36.59        | -106.73       | 1.000       | 0.402                   | 2.0       |
| 9306    | South Holston Lake       | 36.52        | -82.09        | 1.000       | 0.281                   | 24.9      |
| 9313    | Beaver Lake              | 36.42        | -93.85        | 0.998       | 0.101                   | 3.1       |
| 9319    | Lake Hudson              | 36.30        | -95.16        | 0.936       | 0.046                   | 21.5      |
| 9322    | Norfork Lake             | 36.25        | -92.24        | 0.999       | 0.063                   | 1.4       |
| 9326    | Cherokee Lake            | 36.16        | -83.50        | 0.999       | 0.468                   | 6.8       |
| 9327    | J. Percy Priest Lake     | 36.16        | -86.62        | 0.964       | 0.116                   | 11.9      |
| 9330    | Center Hill Lake         | 36.10        | -85.83        | 0.998       | 0.071                   | 2.8       |
| 9332    | Douglas Lake             | 35.96        | -83.53        | 1.000       | 0.111                   | 1.5       |
| 9333    | Falls Lake               | 35.95        | -78.58        | 0.985       | 0.242                   | 9.8       |
| 9335    | Fort Gibson Lake         | 35.87        | -95.23        | 0.844       | 0.313                   | 29.3      |
| 9345    | Isabella Lake            | 35.65        | -118.48       | 1.000       | 0.176                   | 2.5       |
| 9348    | Tenkiller Lake           | 35.60        | -95.04        | 0.999       | 0.120                   | 3.9       |
| 9355    | Ute Reservoir            | 35.35        | -103.45       | 0.983       | 0.299                   | 23.4      |
| 9358    | Lake Thunderbird         | 35.22        | -97.22        | 0.618       | 0.114                   | 62.6      |
| 9360    | Lake Mohave              | 35.20        | -114.57       | 0.964       | 0.115                   | 8.8       |
| 9367    | Chatuge Lake             | 35.02        | -83.79        | 1.000       | 0.131                   | 53.8      |
| 9371    | Wister Lake              | 34.94        | -94.72        | 0.999       | 0.216                   | 15.8      |
| 9378    | Arkabutla Lake           | 34.76        | -90.12        | 0.995       | 0.164                   | 5.2       |
| 9396    | Waurika Lake             | 34.24        | -98.06        | 0.992       | 0.103                   | 16.2      |
| 9397    | Alamo Lake               | 34.24        | -113.60       | 0.986       | 0.125                   | 9.1       |
| 9398    | Degray Lake              | 34.22        | -93.11        | 0.996       | 0.149                   | 3.8       |
| 9401    | Lake Greenwood           | 34.17        | -81.91        | 0.913       | 0.160                   | 25.0      |
| 9405    | Lake Greeson             | 34.15        | -93.72        | 1.000       | 0.110                   | 15.7      |
| 9406    | Broken Bow Lake          | 34.15        | -94.68        | 0.998       | 0.163                   | 14.9      |
| 9411    | Hugo Lake                | 34.01        | -95.38        | 0.562       | 0.097                   | 35.5      |
| 9412    | Lewis Smith Lake         | 33.94        | -87.11        | 0.998       | 0.163                   | 4.2       |
| 9414    | Pat Mayse Lake           | 33.85        | -95.56        | 0.977       | 0.152                   | 13.1      |
| 9415    | Lake Pleasant            | 33.85        | -112.27       | 1.000       | 0.125                   | 1.3       |
| 9419    | Lake Kemp                | 33.75        | -99.15        | 0.991       | 0.123                   | 13.9      |
| 9420    | Millwood Lake            | 33.69        | -93.97        | 0.643       | 0.273                   | 64.0      |
| 9424    | Lake Kickapoo            | 33.66        | -98.78        | 0.911       | 0.159                   | 15.8      |
| 9434    | Texarkana Lake           | 33.31        | -94.16        | 0.996       | 0.104                   | 5.2       |
| 9436    | Lake Tuscaloosa          | 33.27        | -87.51        | 1.000       | 0.173                   | 47.2      |
| 9438    | Lake Bridgeport          | 33.22        | -97.83        | 0.672       | 0.100                   | 41.1      |
| 9443    | Lewisville Lake          | 33.07        | -96.97        | 0.941       | 0.078                   | 15.0      |
| 9446    | Lavon Lake               | 33.03        | -96.47        | 0.988       | 0.144                   | 8.1       |
| 9450    | Grapevine Lake           | 32.97        | -97.06        | 0.999       | 0.046                   | 2.0       |
| 9454    | Eagle Mountain Lake      | 32.87        | -97.50        | 0.999       | 0.056                   | 9.2       |
| 9455    | Possum Kingdom Lake      | 32.87        | -98.43        | 0.936       | 0.522                   | 71.3      |
| 9456    | Hubbard Creek Lake       | 32.83        | -98.96        | 0.545       | 0.040                   | 43.5      |
| 9457    | Lake Fork                | 32.81        | -95.53        | 0.954       | 0.073                   | 11.9      |
| 9460    | Lake Ray Hubbard         | 32.80        | -96.50        | 0.966       | 0.073                   | 20.0      |
| 9462    | Lake O' the Pines        | 32.75        | -94.51        | 0.996       | 0.064                   | 2.9       |
| 9463    | Lake Claiborne           | 32.74        | -92.91        | 0.367       | 0.194                   | 58.0      |
| 9464    | Bayou Darbonne Reservoir | 32.71        | -92.34        | 0.815       | 0.142                   | 26.0      |
| 9465    | Caddo Lake               | 32.71        | -93.92        | 0.947       | 0.101                   | 15.8      |
| 9467    | Benbrook Lake            | 32.65        | -97.46        | 0.972       | 0.228                   | 8.2       |
| 9468    | Joe Pool Lake            | 32.64        | -96.99        | 0.880       | 0.257                   | 49.5      |
| 9473    | Cross Lake               | 32.51        | -93.80        | 0.867       | 0.088                   | 41.2      |

| Lake ID | Lake name                 | Latitude (°) | Longitude (°) | Pearson's r | RMSE (km <sup>3</sup> ) | NRMSE (%) |
|---------|---------------------------|--------------|---------------|-------------|-------------------------|-----------|
| 9475    | Ross R. Barnett Reservoir | 32.40        | -90.06        | 0.906       | 0.158                   | 28.8      |
| 9477    | Lake Granbury             | 32.38        | -97.69        | 0.324       | 0.081                   | 38.1      |
| 9478    | Lake Bistineau            | 32.32        | -93.42        | 0.144       | 0.122                   | 200.4     |
| 9481    | Martin Lake               | 32.27        | -94.54        | 0.949       | 0.076                   | 24.8      |
| 9482    | Bardwell Lake             | 32.25        | -96.65        | 0.980       | 0.370                   | 15.4      |
| 9484    | Lake Palestine            | 32.15        | -95.47        | 1.000       | 0.171                   | 19.4      |
| 9486    | Lake Murvaul              | 32.04        | -94.42        | 0.742       | 0.171                   | 43.0      |
| 9487    | Navarro Mills Lake        | 31.95        | -96.70        | 1.000       | 0.082                   | 12.9      |
| 9490    | E. V. Spence Reservoir    | 31.90        | -100.52       | 0.968       | 0.057                   | 15.6      |
| 9492    | Lake Whitney              | 31.87        | -97.37        | 0.995       | 0.086                   | 4.0       |
| 9493    | Lake Blackshear           | 31.85        | -83.94        | -0.758      | 0.078                   | 256.5     |
| 9495    | Lake Brownwood            | 31.84        | -99.00        | 0.990       | 0.039                   | 6.0       |
| 9496    | Lake Waco                 | 31.58        | -97.20        | 0.922       | 0.172                   | 21.6      |
| 9504    | Lake Limestone            | 31.33        | -96.33        | 0.936       | 0.138                   | 20.5      |
| 9508    | Stillhouse Hollow Lake    | 31.02        | -97.53        | 0.992       | 0.085                   | 4.9       |
| 9513    | Steinhagen Reservoir      | 30.80        | -94.17        | -0.411      | 0.084                   | 137.2     |
| 9516    | Lake Seminole             | 30.71        | -84.87        | 0.595       | 0.158                   | 36.9      |
| 9525    | Lake Talquin              | 30.39        | -84.65        | 0.401       | 0.035                   | 57.9      |
| 9526    | Lake Conroe               | 30.36        | -95.56        | 0.896       | 0.149                   | 37.7      |
| 9528    | Somerville Lake           | 30.31        | -96.52        | 0.985       | 0.212                   | 10.2      |
| 9540    | Lake Houston              | 29.92        | -95.13        | 0.902       | 0.108                   | 27.2      |
| 9542    | Canyon Lake               | 29.87        | -98.20        | 0.988       | 0.040                   | 11.9      |
| 9594    | Lake Texana               | 28.89        | -96.57        | 0.719       | 0.119                   | 97.8      |
| 9605    | Choke Canyon Lake         | 28.48        | -98.25        | 0.967       | 0.172                   | 13.5      |
| 9615    | Lake Corpus Christi       | 28.05        | -97.87        | 0.990       | 0.109                   | 8.3       |

**Table S2.** Validation of area-derived water levels for the 132 lakes described in Table S1. The notations are the same as those described in the legend to Table S1.

| Lake ID | Lake name                   | Latitude (°) | Longitude (°) | Number of pairs | Pearson's r | RMSE (m) | NRMSE (%) |
|---------|-----------------------------|--------------|---------------|-----------------|-------------|----------|-----------|
| 64      | Lake Champlain              | 45.05        | -73.33        | 6               | 0.952       | 0.318    | 31.3      |
| 145     | Lake Hongze                 | 33.09        | 118.73        | 20              | 0.547       | 0.423    | 23.3      |
| 730     | Flathead Lake               | 47.68        | -114.23       | 10              | 0.393       | 0.758    | 34.5      |
| 743     | Canyon Ferry Lake           | 46.65        | -111.73       | 5               | 0.652       | 1.261    | 25.8      |
| 784     | Flaming Gorge Reservoir     | 40.92        | -109.42       | 17              | 0.935       | 0.438    | 13.4      |
| 786     | Shasta Lake                 | 40.72        | -122.42       | 9               | 0.974       | 2.873    | 6.3       |
| 792     | Lake Tahoe                  | 39.16        | -120.14       | 7               | 0.828       | 0.561    | 26.9      |
| 796     | Harry S. Truman Reservoir   | 38.26        | -93.41        | 6               | 0.869       | 0.918    | 14.0      |
| 797     | Osage Lake                  | 38.21        | -92.63        | 8               | -0.061      | 0.747    | 54.2      |
| 799     | Lake Powell                 | 37.37        | -110.73       | 16              | 0.966       | 2.072    | 9.4       |
| 800     | Lake Barkley                | 37.02        | -88.22        | 13              | -0.091      | 0.684    | 41.6      |
| 804     | Table Rock Lake             | 36.60        | -93.31        | 13              | 0.448       | 2.264    | 36.2      |
| 805     | John H. Kerr Reservoir      | 36.60        | -78.29        | 7               | 0.470       | 2.395    | 69.9      |
| 806     | Grand Lake                  | 36.47        | -95.04        | 11              | 0.094       | 1.260    | 42.1      |
| 807     | Oologah Lake                | 36.42        | -95.68        | 8               | 0.680       | 0.667    | 12.4      |
| 811     | Greers Ferry Lake           | 35.52        | -91.99        | 11              | 0.558       | 1.578    | 25.5      |
| 814     | Robert S. Kerr Reservoir    | 35.35        | -94.78        | 13              | 0.303       | 0.190    | 31.6      |
| 822     | Hartwell Lake               | 34.36        | -82.82        | 12              | 0.739       | 1.138    | 23.1      |
| 823     | Lake Sidney Lanier          | 34.16        | -84.07        | 15              | 0.629       | 1.627    | 27.6      |
| 825     | Lake Texoma                 | 33.82        | -96.57        | 18              | 0.782       | 1.430    | 17.5      |
| 826     | Grenada Lake                | 33.81        | -89.77        | 4               | 0.897       | 1.048    | 11.2      |
| 830     | Lake Moultrie               | 33.24        | -80.00        | 5               | -0.033      | 0.121    | 17.8      |
| 831     | Elephant Butte Reservoir    | 33.16        | -107.19       | 3               | 0.964       | 5.389    | 31.9      |
| 832     | Lake Tawakoni               | 32.81        | -95.91        | 6               | 0.954       | 0.709    | 18.4      |
| 835     | Cedar Creek Reservoir       | 32.18        | -96.07        | 12              | 0.887       | 0.496    | 25.5      |
| 836     | Richland-Chambers Reservoir | 31.95        | -96.10        | 2               | 0.877       | 1.048    | 31.8      |
| 838     | Toledo Bend Reservoir       | 31.17        | -93.57        | 23              | 0.837       | 0.827    | 24.1      |
| 839     | Sam Rayburn Reservoir       | 31.06        | -94.11        | 19              | 0.859       | 1.127    | 22.5      |
| 841     | Lake Livingston             | 30.63        | -95.02        | 11              | 0.659       | 0.516    | 36.0      |
| 848     | Amistad Reservoir           | 29.45        | -101.05       | 24              | 0.990       | 0.761    | 4.7       |
| 855     | Falcon Reservoir            | 26.56        | -99.17        | 14              | 0.978       | 1.098    | 8.8       |
| 9074    | Great Sacandaga Lake        | 43.32        | -73.92        | 3               | 0.918       | 0.838    | 24.1      |
| 9096    | Owasco Lake                 | 42.90        | -76.54        | 3               | -0.342      | 0.205    | 40.4      |
| 9097    | Canandagua Lake             | 42.87        | -77.27        | 4               | -0.481      | 0.363    | 102.2     |
| 9132    | Fontenelle Reservoir        | 42.03        | -110.07       | 3               | 0.701       | 1.438    | 15.2      |
| 9172    | Trinity Lake                | 40.80        | -122.76       | 8               | 0.988       | 2.193    | 4.5       |
| 9180    | Whiskeytown Lake            | 40.60        | -122.54       | 2               | 0.507       | 2.337    | 69.2      |
| 9189    | Starvation Reservoir        | 40.19        | -110.44       | 2               | 0.890       | 0.972    | 13.4      |
| 9194    | Strawberry Reservoir        | 40.14        | -111.03       | 3               | 0.847       | 1.969    | 35.8      |
| 9208    | Lake Oroville               | 39.54        | -121.48       | 7               | 0.979       | 5.037    | 7.3       |
| 9209    | Mark Twain Lake             | 39.53        | -91.65        | 6               | 0.604       | 1.145    | 19.4      |
| 9212    | Stampede Reservoir          | 39.47        | -120.11       | 2               | 0.969       | 3.098    | 10.8      |
| 9220    | New Bullards Bar Reservoir  | 39.39        | -121.14       | 5               | 0.941       | 4.232    | 9.6       |
| 9224    | Tuttle Creek Lake           | 39.26        | -96.59        | 6               | 0.640       | 3.564    | 21.8      |
| 9229    | Monroe Lake                 | 39.01        | -86.50        | 4               | 0.397       | 1.035    | 25.7      |
| 9235    | Folsom Lake                 | 38.71        | -121.16       | 6               | 0.971       | 4.215    | 15.8      |
| 9239    | Carlyle Lake                | 38.62        | -89.35        | 9               | 0.494       | 0.933    | 32.7      |
| 9244    | Ruedi Reservoir             | 38.45        | -107.33       | 6               | 0.936       | 3.414    | 14.7      |
| 9246    | Patoka Lake                 | 38.43        | -86.71        | 5               | 0.263       | 2.039    | 51.5      |
| 9259    | New Hogan Lake              | 38.15        | -120.81       | 4               | 0.962       | 2.143    | 8.5       |
| 9272    | Don Pedro Reservoir         | 37.70        | -120.42       | 4               | 0.981       | 2.644    | 6.3       |
| 9277    | McPhee Reservoir            | 37.58        | -108.57       | 4               | 0.959       | 4.189    | 22.4      |
| 9284    | Green River Lake            | 37.25        | -85.34        | 3               | 0.106       | 1.941    | 34.3      |
| 9295    | Barren River Lake           | 36.89        | -86.12        | 2               | 0.638       | 4.528    | 33.8      |
| 9299    | Great Salt Plains Lake      | 36.75        | -98.14        | 3               | 0.838       | 0.058    | 15.4      |

| Lake ID | Lake name                 | Latitude (°) | Longitude (°) | Number of pairs | Pearson's r | RMSE (m) | NRMSE (%) |
|---------|---------------------------|--------------|---------------|-----------------|-------------|----------|-----------|
| 9300    | Kaw Lake                  | 36.70        | -96.93        | 6               | 0.791       | 0.836    | 12.7      |
| 9301    | Heron Reservoir           | 36.67        | -106.70       | 5               | 0.984       | 1.512    | 6.3       |
| 9304    | El Vado Lake              | 36.59        | -106.73       | 3               | 0.965       | 5.246    | 17.9      |
| 9306    | South Holston Lake        | 36.52        | -82.09        | 3               | 0.072       | 2.348    | 35.0      |
| 9313    | Beaver Lake               | 36.42        | -93.85        | 3               | 0.606       | 2.344    | 40.5      |
| 9319    | Lake Hudson               | 36.30        | -95.16        | 1               | 0.430       | 0.558    | 16.7      |
| 9322    | Norfork Lake              | 36.25        | -92.24        | 3               | 0.767       | 3.111    | 29.9      |
| 9326    | Cherokee Lake             | 36.16        | -83.50        | 4               | 0.598       | 5.696    | 58.3      |
| 9327    | J. Percy Priest Lake      | 36.16        | -86.62        | 4               | 0.421       | 1.118    | 51.2      |
| 9330    | Center Hill Lake          | 36.10        | -85.83        | 3               | -0.099      | 3.654    | 50.7      |
| 9332    | Douglas Lake              | 35.96        | -83.53        | 7               | 0.798       | 2.870    | 22.0      |
| 9333    | Falls Lake                | 35.95        | -78.58        | 6               | 0.416       | 0.867    | 41.2      |
| 9335    | Fort Gibson Lake          | 35.87        | -95.23        | 5               | 0.609       | 2.115    | 32.4      |
| 9345    | Isabella Lake             | 35.65        | -118.48       | 4               | 0.990       | 1.093    | 5.8       |
| 9348    | Tenkiller Lake            | 35.60        | -95.04        | 6               | 0.526       | 2.048    | 21.5      |
| 9355    | Ute Reservoir             | 35.35        | -103.45       | 5               | 0.900       | 0.744    | 36.2      |
| 9358    | Lake Thunderbird          | 35.22        | -97.22        | 4               | 0.282       | 0.679    | 57.1      |
| 9360    | Lake Mohave               | 35.20        | -114.57       | 8               | 0.619       | 1.030    | 37.4      |
| 9367    | Chatuge Lake              | 35.02        | -83.79        | 2               | 0.096       | 0.874    | 30.3      |
| 9371    | Wister Lake               | 34.94        | -94.72        | 3               | 0.566       | 1.170    | 20.8      |
| 9378    | Arkabutla Lake            | 34.76        | -90.12        | 3               | 0.801       | 2.418    | 30.2      |
| 9396    | Waurika Lake              | 34.24        | -98.06        | 1               | 0.520       | 0.259    | 21.6      |
| 9397    | Alamo Lake                | 34.24        | -113.60       | 4               | 0.976       | 2.912    | 19.7      |
| 9398    | Degray Lake               | 34.22        | -93.11        | 9               | 0.531       | 1.210    | 28.7      |
| 9401    | Lake Greenwood            | 34.17        | -81.91        | 5               | 0.185       | 1.578    | 124.4     |
| 9405    | Lake Greeson              | 34.15        | -93.72        | 1               | 0.473       | 0.974    | 21.8      |
| 9406    | Broken Bow Lake           | 34.15        | -94.68        | 2               | 0.428       | 1.621    | 25.5      |
| 9411    | Hugo Lake                 | 34.01        | -95.38        | 7               | 0.727       | 0.916    | 11.8      |
| 9412    | Lewis Smith Lake          | 33.94        | -87.11        | 2               | 0.062       | 1.409    | 28.5      |
| 9414    | Pat Mayse Lake            | 33.85        | -95.56        | 6               | 0.782       | 0.746    | 21.8      |
| 9415    | Lake Pleasant             | 33.85        | -112.27       | 4               | 0.984       | 1.293    | 8.7       |
| 9419    | Lake Kemp                 | 33.75        | -99.15        | 4               | 0.837       | 1.065    | 45.5      |
| 9420    | Millwood Lake             | 33.69        | -93.97        | 3               | 0.656       | 0.597    | 25.2      |
| 9424    | Lake Kickapoo             | 33.66        | -98.78        | 3               | 0.755       | 0.329    | 22.4      |
| 9434    | Texarkana Lake            | 33.31        | -94.16        | 13              | 0.507       | 2.550    | 33.7      |
| 9436    | Lake Tuscaloosa           | 33.27        | -87.51        | 1               | 0.132       | 0.710    | 103.8     |
| 9438    | Lake Bridgeport           | 33.22        | -97.83        | 5               | 0.986       | 5.364    | 70.8      |
| 9443    | Lewisville Lake           | 33.07        | -96.97        | 9               | 0.916       | 0.739    | 15.5      |
| 9446    | Lavon Lake                | 33.03        | -96.47        | 4               | 0.910       | 0.733    | 12.0      |
| 9450    | Grapevine Lake            | 32.97        | -97.06        | 5               | 0.900       | 1.536    | 17.4      |
| 9454    | Eagle Mountain Lake       | 32.87        | -97.50        | 6               | 0.954       | 0.482    | 14.5      |
| 9455    | Possum Kingdom Lake       | 32.87        | -98.43        | 11              | 0.967       | 0.377    | 8.7       |
| 9456    | Hubbard Creek Lake        | 32.83        | -98.96        | 3               | 0.977       | 6.485    | 69.7      |
| 9457    | Lake Fork                 | 32.81        | -95.53        | 6               | 0.771       | 0.888    | 40.8      |
| 9460    | Lake Ray Hubbard          | 32.80        | -96.50        | 4               | 0.876       | 0.900    | 32.2      |
| 9462    | Lake O' the Pines         | 32.75        | -94.51        | 6               | 0.727       | 2.098    | 48.1      |
| 9463    | Lake Claiborne            | 32.74        | -92.91        | 4               | 0.355       | 1.336    | 55.3      |
| 9464    | Bayou Darbonne Reservoir  | 32.71        | -92.34        | 3               | 0.447       | 0.393    | 20.7      |
| 9465    | Caddo Lake                | 32.71        | -93.92        | 8               | 0.580       | 0.619    | 51.5      |
| 9467    | Benbrook Lake             | 32.65        | -97.46        | 4               | 0.804       | 1.255    | 23.6      |
| 9468    | Joe Pool Lake             | 32.64        | -96.99        | 8               | 0.625       | 0.464    | 16.3      |
| 9473    | Cross Lake                | 32.51        | -93.80        | 3               | 0.380       | 0.292    | 29.9      |
| 9475    | Ross R. Barnett Reservoir | 32.40        | -90.06        | 3               | 0.225       | 0.203    | 43.5      |
| 9477    | Lake Granbury             | 32.38        | -97.69        | 9               | 0.941       | 1.033    | 33.8      |
| 9478    | Lake Bistineau            | 32.32        | -93.42        | 2               | 0.560       | 1.368    | 50.3      |
| 9481    | Martin Lake               | 32.27        | -94.54        | 4               | 0.710       | 0.978    | 30.5      |
| 9482    | Bardwell Lake             | 32.25        | -96.65        | 6               | 0.776       | 0.954    | 21.0      |

| Lake ID | Lake name              | Latitude (°) | Longitude (°) | Number of pairs | Pearson's r | RMSE (m) | NRMSE (%) |
|---------|------------------------|--------------|---------------|-----------------|-------------|----------|-----------|
| 9484    | Lake Palestine         | 32.15        | -95.47        | 2               | 0.572       | 0.406    | 19.1      |
| 9486    | Lake Murvaul           | 32.04        | -94.42        | 1               | 0.553       | 0.385    | 26.3      |
| 9487    | Navarro Mills Lake     | 31.95        | -96.70        | 3               | 0.672       | 0.534    | 15.6      |
| 9490    | E. V. Spence Reservoir | 31.90        | -100.52       | 3               | 0.935       | 3.620    | 29.1      |
| 9492    | Lake Whitney           | 31.87        | -97.37        | 5               | 0.903       | 0.885    | 12.5      |
| 9493    | Lake Blackshear        | 31.85        | -83.94        | 3               | -0.194      | 0.172    | 19.6      |
| 9495    | Lake Brownwood         | 31.84        | -99.00        | 10              | 0.972       | 1.345    | 27.7      |
| 9496    | Lake Waco              | 31.58        | -97.20        | 5               | 0.618       | 0.957    | 18.5      |
| 9504    | Lake Limestone         | 31.33        | -96.33        | 6               | 0.378       | 0.732    | 53.2      |
| 9508    | Stillhouse Hollow Lake | 31.02        | -97.53        | 10              | 0.256       | 1.485    | 24.6      |
| 9513    | Steinhagen Reservoir   | 30.80        | -94.17        | 0               | -0.115      | 0.316    | 83.5      |
| 9516    | Lake Seminole          | 30.71        | -84.87        | 9               | 0.285       | 0.269    | 37.1      |
| 9525    | Lake Talquin           | 30.39        | -84.65        | 4               | 0.067       | 0.077    | 23.6      |
| 9526    | Lake Conroe            | 30.36        | -95.56        | 7               | 0.577       | 0.868    | 44.5      |
| 9528    | Somerville Lake        | 30.31        | -96.52        | 6               | 0.831       | 1.138    | 16.0      |
| 9540    | Lake Houston           | 29.92        | -95.13        | 4               | 0.192       | 0.754    | 37.8      |
| 9542    | Canyon Lake            | 29.87        | -98.20        | 3               | 0.931       | 1.142    | 28.1      |
| 9594    | Lake Texana            | 28.89        | -96.57        | 6               | 0.553       | 0.559    | 31.6      |
| 9605    | Choke Canyon Lake      | 28.48        | -98.25        | 6               | 0.936       | 2.757    | 39.4      |
| 9615    | Lake Corpus Christi    | 28.05        | -97.87        | 7               | 0.948       | 0.988    | 19.0      |

**Table S3.** Validation of the estimated lake volumes. In situ measurements of lake volume of 14 lakes were used to assess the accuracy of the lake volumes estimated by the current study. Specifically, daily measurements of volume for El Vado Lake, Utah Lake, Lake Powell, Blue Mesa Reservoir, Elephant Butte Reservoir, Flaming Gorge Reservoir, Fontenelle Reservoir, Heron Reservoir, and McPhee Reservoir were obtained from the USBR (United States Bureau of Reclamation) website (<https://www.usbr.gov/rsvrWater/HistoricalApp.html>). Daily measurements of volume for West Point Lake, Lake Mead, Lake Seminole, and Lake Sidney Lanier were sourced from the USGS (United States Geological Survey) website (<https://waterdata.usgs.gov/nwis/>). Monthly measurements of volume for Lake Argyle were obtained from the Water Corporation website (<https://www.watercorporation.com.au/>). Spatial distribution of the 14 lakes is shown in Figure S5. In the table below, "Number of pairs" indicates the number of paired observations between lake water level and lake area; "Pearson's  $r$ " signifies the Pearson correlation coefficient between estimated and in situ time series of lake volume; "RMSE" is the root mean square error between estimated and in situ time series of lake volume; "NRMSE" is the normalized RMSE, and is calculated as RMSE divided by the range of in situ lake volumes; "Proportion" signifies the proportion of the in situ volumes falling into the 90% confidence interval of the estimated volume.

| Lake ID | Lake name                | Latitude<br>(°) | Longitude<br>(°) | Number of<br>pairs | Pearson's $r$ | RMSE<br>(km <sup>3</sup> ) | NRMSE<br>(%) | Proportion<br>(%) |
|---------|--------------------------|-----------------|------------------|--------------------|---------------|----------------------------|--------------|-------------------|
| 784     | Flaming Gorge Reservoir  | 40.92           | -109.42          | 17                 | 0.963         | 0.220                      | 18.3         | 78.4              |
| 788     | Utah Lake                | 40.36           | -111.89          | 11                 | 0.907         | 0.126                      | 12.9         | 100.0             |
| 799     | Lake Powell              | 37.37           | -110.73          | 16                 | 0.974         | 0.765                      | 6.1          | 91.8              |
| 809     | Lake Mead                | 36.02           | -114.74          | 32                 | 0.982         | 1.772                      | 18.9         | 84.8              |
| 823     | Lake Sidney Lanier       | 34.16           | -84.07           | 15                 | 0.659         | 0.186                      | 19.4         | 70.0              |
| 831     | Elephant Butte Reservoir | 33.16           | -107.19          | 3                  | 0.967         | 0.292                      | 37.5         | 52.1              |
| 1632    | Lake Argyle              | -16.12          | 128.74           | 33                 | 0.975         | 0.637                      | 3.5          | 68.6              |
| 9132    | Fontenelle Reservoir     | 42.03           | -110.07          | 3                  | 0.738         | 0.039                      | 15.1         | 99.0              |
| 9244    | Blue Mesa Reservoir      | 38.45           | -107.33          | 6                  | 0.935         | 0.080                      | 11.4         | 94.4              |
| 9277    | McPhee Reservoir         | 37.58           | -108.57          | 4                  | 0.959         | 0.061                      | 22.9         | 55.6              |
| 9301    | Heron Reservoir          | 36.67           | -106.70          | 5                  | 0.984         | 0.021                      | 6.2          | 94.8              |
| 9304    | El Vado Lake             | 36.59           | -106.73          | 3                  | 0.974         | 0.030                      | 14.0         | 98.0              |
| 9452    | West Point Lake          | 32.92           | -85.19           | 1                  | 0.497         | 0.124                      | 34.4         | 69.8              |
| 9516    | Lake Seminole            | 30.71           | -84.87           | 9                  | 0.449         | 0.014                      | 29.9         | 97.8              |
